# Supplementary material for: Plastid Genome-Based Phylogeny Pinpointed the Origin of the Green-Colored Plastid in the Dinoflagellate Lepidodinium chlorophorum
Source: PubMed Central journal article supplement (PMC4419806; doi:10.1093/gbe/evv060), 2015-04-02
Supplement: supp_evv060_Supplementary_Figres_S1-6.pdf [file supp_evv060_Supplementary_Figres_S1-6.pdf]

**A** rpl19-atpA

Rpl19  
 ATGAAATATCTCGCATAATCTTATACGTAAAATTTGAAAGACGCTGAAACTAAAT  
 M K M Y S H N L M R K I I E R R L K L N  
 ATAGATCTATTCAAAGTAGGAGATACAATCAAGTATATGGTAAACTCAAGAAAGCGAA  
 M D L F K V G D T I Q V Y G K L Q E S E  
 AGACAGCGCATTCAAATTTATCTAGGATCTTGCAATAAAAAAGGAATGGTAGAACA  
 R Q R I Q F Y L G I L Q M K K G I G R T  
 ACTATAAGAAATGTTCTGAGTGAATTAATGGTGAATCAAAATAAAATGTACATTTTAT  
 T M R I V L S E F N G E I K M K C T F Y  
 CTTAATTCGAATGATGATTATATAGTAATTTACACAAGCCAATCTATATATATTTT  
 L N S K L I D Y M V I L H K P I Y M Y F  
 TTGTTACCAAAAGCAGCTCTAATTTTAAATATAAATTTTACTATGACAAAAATCAA  
 L L P K A A L I F K Y K F F T M T K I Q  
 CCCAAGAAATTAATCGCATTATCAAAAGCCAACACTAGATCTAGTAAAGACAAAAAT  
 P E E I T R I I K S Q L L R S S K S K N  
 TCGTTTATCATGTGGGAACAGTACTTCAAATGGCGATGGAAATGTACGTATTTATGGA  
 S F I H V G T V L Q I G D G I V R I Y G  
 CTAATAAAGCAATAGCTGGCAACTTTGCGATTGAAGTGAAGGATTACCGTCGGA  
 L N K A M A G E L L R F E V E G F T V G  
 ATTGCTTTGAATCTAGAATACAGCAACGTTGGTGCAGTTTCATAGGAGAAAGCCGTAAT  
 I A L N L E Y S N V G A V L M G E S R N  
 ATTCGTGAAGTACTAAAGTATGGCAACAGGAAAAATGCGCAAGTCCCGTAGGAAAA  
 I R E G T K V W A T G K I A Q V P V G K  
 GAACTTTGGTTCGAATTTAAATTCGCTGGCAGCCCTGTCGATGGTCTAGGCGATAT  
 E L L G R I V N S L A A P V D G L G D I  
 TATCTTGTGCGATCCATCTGTAGAGGCACCTGCGCTGATATTATGACCGTCGATCC  
 Y S C A I H L V E A P A P G I I D R R S  
 GTTTTGAACCGTTGCAAACTGGCATCCCTTCTATCGATGCTATAATCCAATGGTCGT  
 V F E P L Q T G I L S I D A M I P I G R  
 GGACAACCGCAATGGTAATGGTGACCGTCAACAGGGAAAACTGCTGTGCAATTGAT  
 G Q R E L V I G D R Q T G K T A V A I D  
 GCGATTTCAACCAACAGGAGAAAGTGAATAACGTTTACGTTGCGATGGTCAAAAA  
 A I L N Q T G E S V K C V Y V A I G Q K  
 AtpA  
 GCATCTTCGGTTGCTCAAGTTGTGAATAATCTAAAAGAACGTTGGAGCAATAGACATACA  
 A S S V A Q V V N N L K E R G A M D Y T  
 GTCATTTGTCAGCTACAGCTGATAGCCAGCTACACTCAATATTTGGTCCATATACA  
 V I V A A T A D S P A T L Q Y L A P Y T  
 GGAGCATCGATTGCAGAACACTTTATGTATGGGGGTCGCACTCTTATAGTTTACGAC  
 G A S I A E H F M Y G G S H T L M V Y D  
 GACTTGTCTAAACATGCTCAGCGTATCGAGAAATATCTTGTGTGTCGCGCACCACT  
 D L S K H A Q A Y R E M S L L L R R P P  
 GGACGTGAAGCATATCTGGAGATATTTTTATGTACATTCGCGATTGTTGGAACGTGCA  
 G R E A Y P G D I F Y V H S R L L E R A  
 GCTCGATTTGACAAATGGGTGGAGCAGTATAACAGCTTTGCTATTTAGTAAACT  
 A R L F D K L G G G S M T A L P I V E T  
 CAAGCAAGAGATGTATCTGCGTATATCCAACAAATGTTATTTGATCACCAGATGGACAA  
 Q A R D V S A Y I P T N V I S I T D G Q  
 ATTTTCTTTCGGCGGATCTAATTAATTCGGGTTTGGCTCTGCTAGATGATGAGAAAT  
 I F L S A D L F N S G L R P A V D V G I  
 TCTGTTTCTCGTGTGCGATCTGCTGCGCAGAAAAAGCCTATAAAGCAAGTTTCGGAAAA  
 S V S R V G S A A Q K K P M K Q V S G K  
 CTTAAGCTAGAAATGGCACAATTTGCTGAATGAGACCTTTGCACAATTCGCTTCTGAC  
 L K L E L A Q F A E L E A F A Q F A S D  
 CTAGACGCTGCAACTCAAAGCCAACCTTGGCGGTGGACGACGCTTCGAGAATGCTGAAA  
 L D A A T Q S Q L A R G R R L R E L L K  
 CAACAACAAATTCCTTCTGTAACAATATGGTGTTCATAATTTTGAAGAAGC  
 Q Q N S P F P V Q N M V F M I F A R T  
 AATGGCTTTCGATAAGTGTGAAATGTGGAAGTTCAAGCGAGCTTCAGCGATTTGTG  
 N G F L D K C E M S E V Q G E L Q R F V  
 CGAAAAGCTATAAATAAGTATAGCACAGAATTTAGTACAACCCTTCTCTGAT  
 R K A M N K Y S T E D F S T N P L P S D  
 TTTGGAGAAAAATAAAGAAATTTACTTCTGCTACTAG  
 F G E K M K E I M L A D \*

**B** psbK-rpl20

PsbK  
 ATGATTTATCTTGGCAAACTTCCTGAAGCATACTCGCTAGTGAATCAATGTAGAT  
 M I Y S L A K L P E A Y S L V K S I V D  
 Rpl20  
 GTGCTACCTATTGTTCTGATTTTTTCTTCTTCTGCTTTTGTATGGCAAGCTTCGGTA  
 V L P I V P V F F L L L A F V W Q A S V  
 AGTTTTCGTTAATATATATATAAAAAATATTTTCTTATGAGACGAGTGAACGC  
 S F R L I M Y Y K K M F F L M R R V K R  
 GAAATCAATGCACAAATTCGACGACAAAAATCCTTTTGTGAGAAAAAGCAATAGAA  
 E I N A Q I R R Q K I L L L R K R A M E  
 TCTAATTTCTGTTCTGTAATAGCGAAACCAACTTATAAAATCTATAAATTTTTCG  
 S N S R S F R M A K Q Q L M K S M N F S  
 TATTGTAGTCAACAAATCGAAAACGCTATTTTCGATCCCTCTGGATTATTTCGACTTAC  
 Y C S Q Q N R K R Y F R S L W I I R L N  
 AGAGCCCTAAAAACGTGCACAATTTCTGATCGCAATATTATTTAAAAATAGATTGAT  
 R A L K T C T I S D R N I M F K N R L I  
 GAGAAGGATACGTTTTTTTTCTCGGATAAATGTAATATCTTACATTCATTACAGCATC  
 E K D T F F F S D K C N Y L T F I Y S I  
 CGACAAGAAAGTGCATCTAAATCGAAAAGTATGGCACAATAGTACTACTCGACCCA  
 R Q R K C I L N R K V M A Q M V L L D P  
 CCATTTTTTATAAATGGTAGATGAGGCTCTATTTATTTAGTAG  
 P F F Y K L V D E A L F M L \*

Figure S1 (Kamikawa et al.)

**A**  
*rpI23* AAAAGAAATATCCAAATGACACTCTCTAGAAATGAATCTGTATTATTTGGGTCTATAAGTCCAGGTATTCGCTATACTACATCCAATGTTTTTAA  
*rpI2* K R N I Q M T L S R N E S V L F W V Y K S R Y S L Y Y I Q C F \*  
 M N L Y Y F G S M S P G I R Y T T S N V F K K A I R H K F N K H

**B**  
*rpI14* TCTCTAGCTCCTGAAGTAGTATTATTTATGAAACAGCGATTGAAAAAGTTTATCAAAATTCGTTGGTACAAAGTGAACACTATCTGAAGTTTCGAATATTACGAATATTCACCAATTCCA  
*rpI5* S L A P E V V L F Y E T A I E K S L S K I D W Y K V E T L S E V F E Y Y E Y S P N S  
 M K Q R L K K V Y Q K L I G T K L K H Y L K F S N I T N I H Q I P  
 AAAATAAAAAAATTTGTATCAATCGAAGGGTAGGTGCACAATCTTTGAAAATGGTAGAACTTTCGATTTGGAATTTGCTTATATCTCGGGACAAAGTGGTATGATTACTCAATTCGCGAAGTCTG  
*rpI14* K N K K N C Y Q S K G R C T I F E N G R N F A I G I V L Y L G T K W Y D Y S F A K F  
*rpI5* K M K K I V I N R R V G A Q S L K M V E T L R L E L S Y I S G Q S G M I T H S R S S  
 TAGCTGGATTTAAATTTCGCAATAAGGTTCTCTAGTATTATAGTAACCTACGAGGAGAACGAATGTACGCCTTTTTTGATCGTTGGTAAACCTAAGACTCCGCGTATTCGAGATTTTCGAGG  
*rpI14* S W I \*  
*rpI5* V A G F K I R N K V P V G I M V T L R G E R M Y A F F D R L V N L R L P R I R D F R

**C**  
*petL* ATTCGCCTGATTTTATATGGTAGAACCACTTTTGTCCGGAAATGTACTTGGTTTGGATTCGCCGTTGTTATTTCTGGACTTTTACGATAGCTTATCTCCAATTTTCGTCGAAGGGACCAATTTATCAACA  
*petG* I R L I L Y G R T T F V G N C T W F D S R C Y F W T F Y D S L S P I S S K G P I I N  
 M V E P L L S G I V L G L I P V V I S G L F T M A Y L Q F R R R D Q L S T  
 ATAAAAACAATGATTTTTTCTGTTATTTGGTTAAATTGAACATATATGCTTACCTAAATAATCTTGTCTATAGCATTATCACTTTTTTTCTTCTGATTTATTTTGGTTTTCTAAGCAGAGA  
*petL* N K N K C I F F V I G \*  
*petG* M K T N V F F S L L V K I E H M C L L \*  
*psbI* M L T L K I F V Y S I I T F F V S V F I F G F L S R

**D**  
*atpI* CACTTAACCAAGTTTAATTATTTAAAGCAGTGAATCAAATTTATTTAAACATGATCCGAAAAACGACAAATTTTCTATAAAACACAAAAAAATACAATCAATTTTTGCAAATTCAAATA  
*rhoC1* H L T S L I I L S S E I K F I L K H D P K K R Q I F L \*  
 M I R K N D K F F Y K N T K K M Q I N F L Q I Q M

**E**  
*rps11* ACAGCTCTTCCACATAATGGCTCTCGATCTCCAAAACGAGCTCGTGTTTTAAATAAAATGGTTTGAATTCTCTATAATTTTCCAGAAAATCTCTTCTACCCAAATGACAGAATTTTTTCTCATTG  
*rpoA* T A L P H N G C R S P K R R R V L M K W F \*  
 M V L N S Y N F S R K S L S T Q M T E F F L H

**F**  
 TGTAAATAACTTATTATTCATTTTCGTTTAAATAAACTAATAACAAGGACATCTCATCGCTTAAAGGCTAAGATATCAAAATCTTGATTTTGTGTGAACAGGGATTCGAGTTCCTTTGAGATTT  
*psaC* C N K L I I H F R L M K L M T R T I L I V \*  
 trnK(cuu)

**G**  
 CAAGATCAACCACATGAGAATCTAATTTTTCTGAAGAAGTTTGCCTCTGGAAACGCTCTTTAAACAACAACTTCGATTTGGTGACAACTCAAGAATCTACGGGTTTGCATGGTGGGCAGGA  
*psbD* Q D Q P H E N L I F P E E V L P R G N A L \*  
*psbC* V E T L F N N K L S I G G Q T Q E S T G F A W W A G

**H**  
 GCAATTTAAATTTTATTGTTATATATGGAAGCTATGTTTATACATTTTGTGATTTGGCACTCTGGAAATFATTTCTTTGCTATTTTTTTCGTTAAACCACCACGTATTGTTAAATTTATGGAA  
*psbB* A I L N F I V M Y G S Y C L Y I F V D W H S W N Y F L C Y F F S \*  
*psbT* M E A I V Y T F L L I G T L G I I F F A I F F R E P P R I V K L L E

**I**  
 ATAACAGCCTTCTATTTCTTCTGTAATTTCTAGAAGTTTGGAAATGGCTCTTTGCTATTTGGAATCTGTTCCCTGCTCTTGGTAAATGAGCATGAGAAAGGAATTTTCATAGCAAAAATGACA  
*psbH* M T A F L F F L V I I L E L W N G S L L L E S V P V S W \*  
*urf129* M A L C Y W N L F L S L G N M S M K K G I S M A K M T

Fig. S2 (Kamikawa et al.)



```

ycf3 ATGCTCTCGATCTCCACGGGAATGACAATTCATTGACAAAAACATTTACAATTATCGCAAAAT
ψycf3 ATGCTCTGAATCTCCAAGAA-----TGACAAAAACATTTATAATTATCGCAAAAT
ycf3 TTAATTTTGAAAGGCATTCCTACTCCAAAAACAGCTAAAATTGCTTTTGCATTTTATCGT
ψycf3 TTAATTTTGAAAGGCATTCCTATTCAAAAAACAGATAAAATAGTTTATGCATTTTATCGT
ycf3 GATGGACTTGCTGCCCAATCGGAGGGAGAAATGCAGAAAGCTCTTAAAAACTATTTTAAAG
ψycf3 GATGGATTCACCGCAATCGAAGAACGAATATGTA-----
ycf3 GCACTTCGCCTCGAAACAGACCCGTTTGTATCGGAGTTACATTCTCTATAATATTAGATTG
ψycf3 -----
ycf3 ATTCATACTCGAATGGACGTTATTGTGCGGCCCTTGAGTATTATTTGCAGCTTTGGAT
ψycf3 -----
ycf3 CGAAATCCGGGACTAGTGCAAGCTCTTAATAATATCAGAATCTTGACCATTGCGCGGGA
ψycf3 -----
ycf3 GAAGAAGCTGTAAAAAATAAATACGAAGTGCTAAGCTTCTATTTCTCGAAGCGCC
ψycf3 -----
ycf3 GAATATTGGAAGAAGCAATTCGACTCACACCTTCTAATTACATTGAAGCTCAAAATTGG
ψycf3 -----
ycf3 ATTCGATAAATCTTCCAATTACAACATAA-----
ψycf3 -----

```

Figure S4 (Kamikawa et al.)



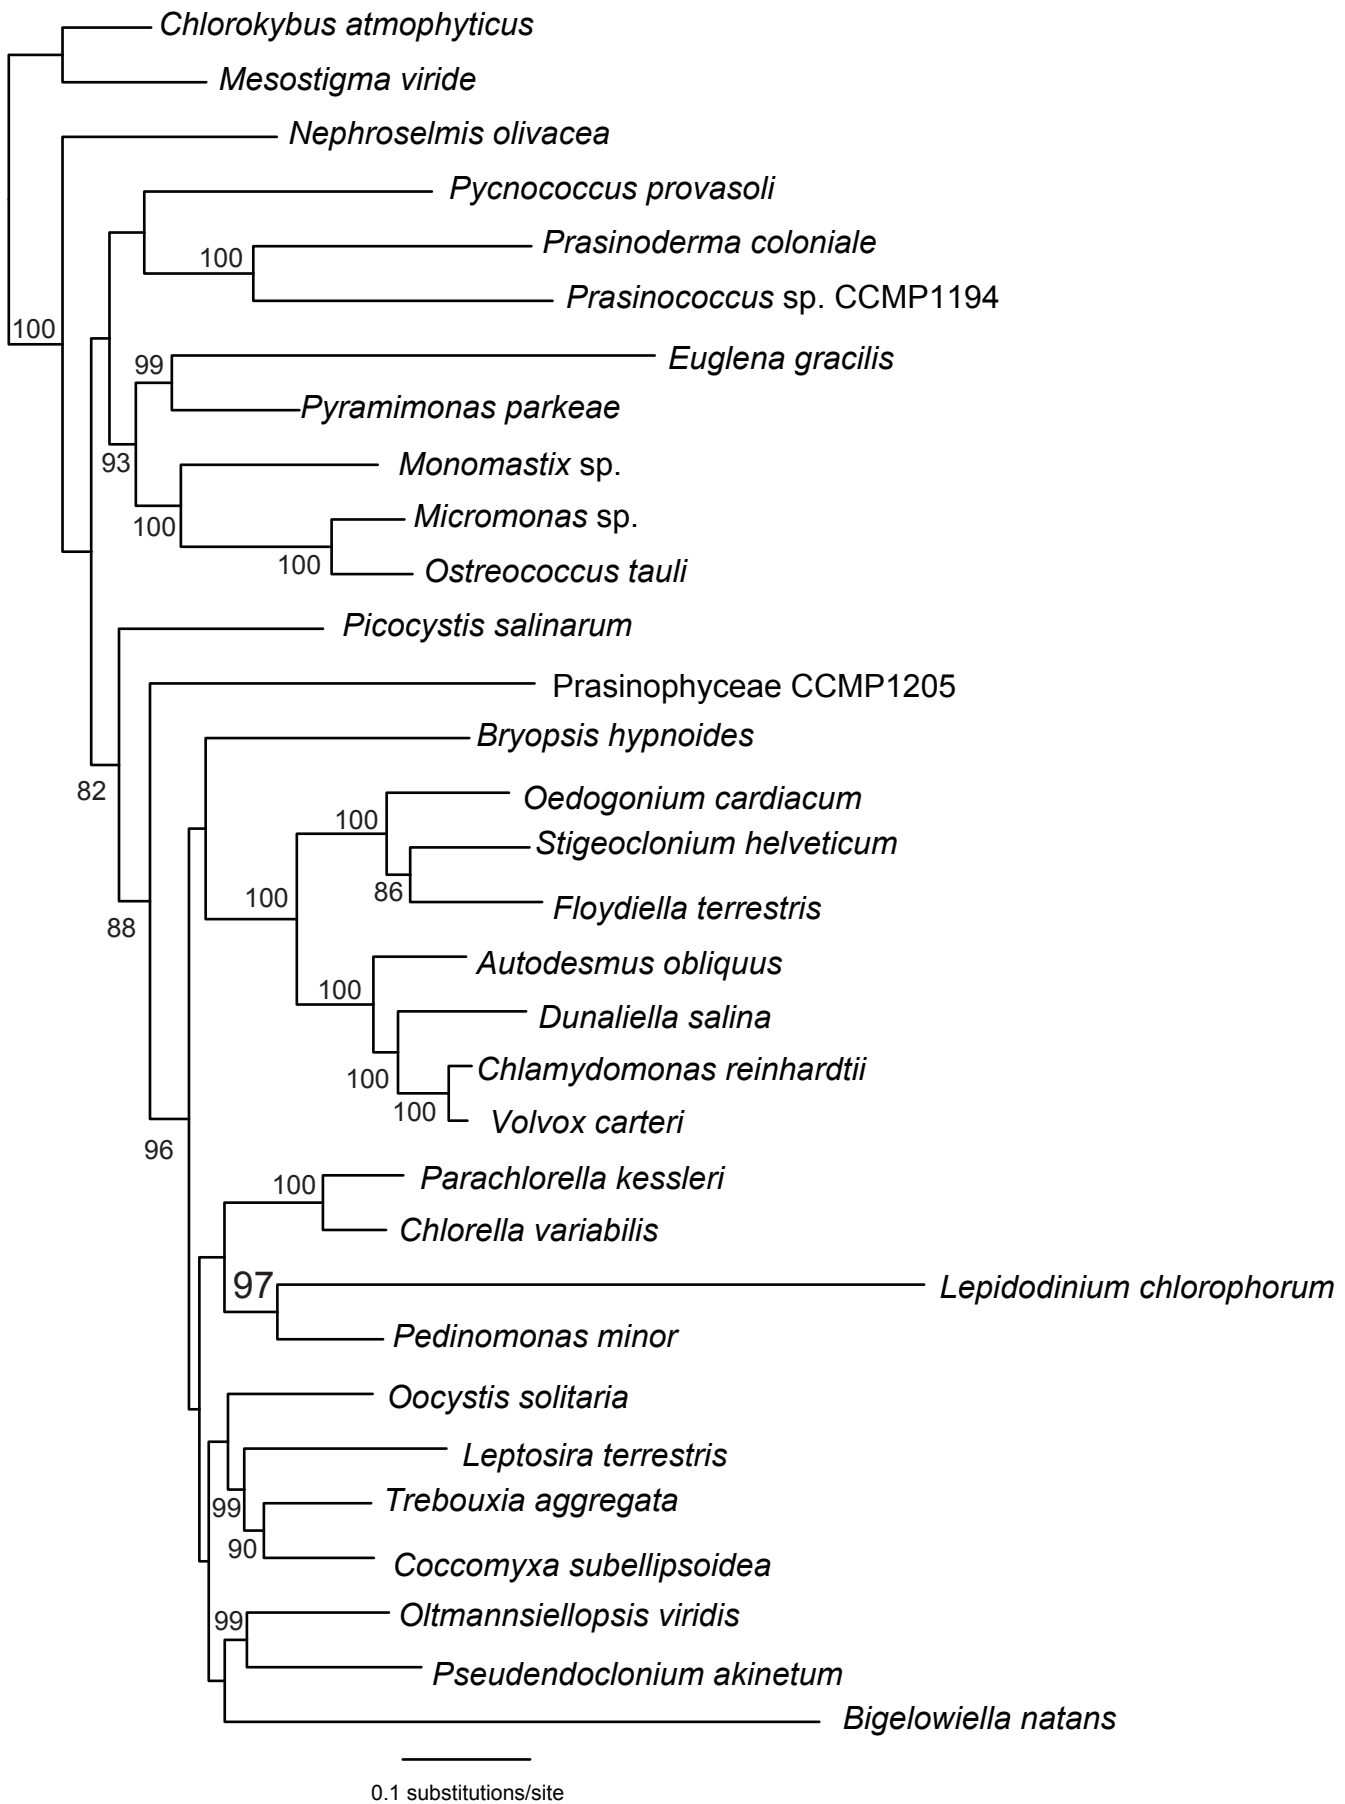

Fig. S6 (Kamikawa et al.)
