# Supplementary material for: Plastid Genome-Based Phylogeny Pinpointed the Origin of the Green-Colored Plastid in the Dinoflagellate Lepidodinium chlorophorum
Source: PubMed Central journal article supplement (PMC4419806; doi:10.1093/gbe/evv060), 2015-04-02
Supplement: supp_evv060_Supplementary_Tables_S1_S2.pdf [file supp_evv060_Supplementary_Tables_S1_S2.pdf]

Table S1. Protein data used for the phylogenomic analyses

| Taxa                               | atpA |             | atpB              |             | atpE |             | atpF |             |
|------------------------------------|------|-------------|-------------------|-------------|------|-------------|------|-------------|
|                                    | aa   | missing (%) | aa                | missing (%) | aa   | missing (%) | aa   | missing (%) |
| <i>Bigelowiella natans</i>         | 437  | 0           | 446               | 0.2         | 118  | 0           | 70   | 0           |
| <i>Bryopsis hypnoides</i>          | 437  | 0           | 447               | 0           | 118  | 0           | 70   | 0           |
| <i>Chlamydomonas reinhardtii</i>   | 437  | 0           | 447               | 0           | 118  | 0           | 70   | 0           |
| <i>Chlorella variabilis</i>        | 437  | 0           | 447               | 0           | 118  | 0           | 70   | 0           |
| <i>Chlorokybus atmophyticus</i>    | 437  | 0           | 447               | 0           | 118  | 0           | 70   | 0           |
| <i>Coccomyxa subellipsoidea</i>    | 437  | 0           | 447               | 0           | 118  | 0           | 70   | 0           |
| <i>Dunaliella salina</i>           | 437  | 0           | 447               | 0           | 118  | 0           | 70   | 0           |
| <i>Euglena gracilis</i>            | 437  | 0           | 447               | 0           | 118  | 0           | 70   | 0           |
| <i>Floydiella terrestris</i>       | 437  | 0           | 447               | 0           | 118  | 0           | 70   | 0           |
| <i>Lepidodinium chlorophorum</i>   | 437  | 0           | 447               | 0           | 118  | 0           | 70   | 0           |
| <i>Leptosira terrestris</i>        | 437  | 0           | 447               | 0           | 118  | 0           | 70   | 0           |
| <i>Mesostigma viride</i>           | 437  | 0           | 447               | 0           | 118  | 0           | 70   | 0           |
| <i>Micromonas sp. RCC299</i>       | 437  | 0           | 447* <sup>1</sup> | 0           | 118  | 0           | 70   | 0           |
| <i>Monomastix sp.</i>              | 437  | 0           | 447               | 0           | 118  | 0           | 70   | 0           |
| <i>Nephroselmis olivacea</i>       | 437  | 0           | 447               | 0           | 118  | 0           | 70   | 0           |
| <i>Oedogonium cardiacum</i>        | 437  | 0           | 447               | 0           | 118  | 0           | 70   | 0           |
| <i>Oltmannsiellopsis viridis</i>   | 437  | 0           | 447               | 0           | 118  | 0           | 70   | 0           |
| <i>Oocystis solitaria</i>          | 437  | 0           | 447               | 0           | 118  | 0           | 70   | 0           |
| <i>Ostreococcus tauli</i>          | 437  | 0           | 447               | 0           | 118  | 0           | 70   | 0           |
| <i>Parachlorella kessleri</i>      | 437  | 0           | 447               | 0           | 118  | 0           | 70   | 0           |
| <i>Pedinomonas minor</i>           | 437  | 0           | 447               | 0           | 118  | 0           | 70   | 0           |
| <i>Picocystis salinarum</i>        | 437  | 0           | 447               | 0           | 118  | 0           | 70   | 0           |
| <i>Prasinococcus sp. CCMP1194</i>  | 437  | 0           | 447               | 0           | 118  | 0           | 70   | 0           |
| <i>Prasinoderma coloniale</i>      | 437  | 0           | 447               | 0           | 118  | 0           | 70   | 0           |
| <i>Prasinophyceae sp. CCMP1205</i> | 437  | 0           | 447               | 0           | 118  | 0           | 70   | 0           |
| <i>Pseudendoclonium akinetum</i>   | 437  | 0           | 447               | 0           | 118  | 0           | 70   | 0           |
| <i>Pycnococcus provasoli</i>       | 437  | 0           | 447               | 0           | 118  | 0           | 70   | 0           |
| <i>Pyramimonas parkeae</i>         | 437  | 0           | 447               | 0           | 118  | 0           | 70   | 0           |
| <i>Autodesmus obliquus</i>         | 437  | 0           | 447               | 0           | 118  | 0           | 70   | 0           |
| <i>Stigeoclonium helveticum</i>    | 437  | 0           | 447               | 0           | 118  | 0           | 70   | 0           |
| <i>Trebouxia aggregata</i>         | 437  | 0           | 447               | 0           | 118  | 0           | 70   | 0           |
| <i>Volvox carteri</i>              | 437  | 0           | 447               | 0           | 118  | 0           | 70   | 0           |

\*1: Not annotated in NC\_012575

\*2: Not annotated in GQ892829

Table S1. Continued.

| Taxa                               | atpH |             | atpI |             | ClpP |             | petA |             |
|------------------------------------|------|-------------|------|-------------|------|-------------|------|-------------|
|                                    | aa   | missing (%) | aa   | missing (%) | aa   | missing (%) | aa   | missing (%) |
| <i>Bigelowiella natans</i>         | 79   | 1.3         | 219  | 0           | 144  | 0           | 274  | 0.7         |
| <i>Bryopsis hypnoides</i>          | 80   | 0           | 219  | 0           | 144  | 0           | 276  | 0           |
| <i>Chlamydomonas reinhardtii</i>   | 80   | 0           | 219  | 0           | 144  | 0           | 276  | 0           |
| <i>Chlorella variabilis</i>        | 80   | 0           | 219  | 0           | 144  | 0           | 276  | 0           |
| <i>Chlorokybus atmophyticus</i>    | 80   | 0           | 219  | 0           | 144  | 0           | 276  | 0           |
| <i>Coccomyxa subellipsoidea</i>    | 57   | 28.8        | 219  | 0           | 144  | 0           | 276  | 0           |
| <i>Dunaliella salina</i>           | 80   | 0           | 219  | 0           | 144  | 0           | 276  | 0           |
| <i>Euglena gracilis</i>            | 79   | 1.3         | 219  | 0           | 0    | 100         | 0    | 100         |
| <i>Floydiella terrestris</i>       | 80   | 0           | 219  | 0           | 144  | 0           | 0    | 100         |
| <i>Lepidodinium chlorophorum</i>   | 80   | 0           | 219  | 0           | 144  | 0           | 274  | 0.7         |
| <i>Leptosira terrestris</i>        | 80   | 0           | 219  | 0           | 144  | 0           | 276  | 0           |
| <i>Mesostigma viride</i>           | 80   | 0           | 219  | 0           | 144  | 0           | 275  | 0.4         |
| <i>Micromonas sp. RCC299</i>       | 80   | 0           | 218  | 0.5         | 144  | 0           | 276  | 0           |
| <i>Monomastix sp.</i>              | 80   | 0           | 219  | 0           | 144  | 0           | 276  | 0           |
| <i>Nephroselmis olivacea</i>       | 80   | 0           | 218  | 0.5         | 144  | 0           | 276  | 0           |
| <i>Oedogonium cardiacum</i>        | 80   | 0           | 219  | 0           | 144  | 0           | 0    | 100         |
| <i>Oltmannsiellopsis viridis</i>   | 80   | 0           | 219  | 0           | 144  | 0           | 276  | 0           |
| <i>Oocystis solitaria</i>          | 80   | 0           | 219  | 0           | 144  | 0           | 276  | 0           |
| <i>Ostreococcus tauli</i>          | 80   | 0           | 218  | 0.5         | 144  | 0           | 276  | 0           |
| <i>Parachlorella kessleri</i>      | 80   | 0           | 219  | 0           | 144  | 0           | 276  | 0           |
| <i>Pedinomonas minor</i>           | 80   | 0           | 219  | 0           | 144  | 0           | 276  | 0           |
| <i>Picocystis salinarum</i>        | 80   | 0           | 219  | 0           | 144  | 0           | 275  | 0.4         |
| <i>Prasinococcus sp. CCMP1194</i>  | 80   | 0           | 218  | 0.5         | 144  | 0           | 276  | 0           |
| <i>Prasinoderma coloniale</i>      | 79   | 1.3         | 219  | 0           | 144  | 0           | 276  | 0           |
| <i>Prasinophyceae sp. CCMP120t</i> | 80   | 0           | 219  | 0           | 144  | 0           | 271  | 1.8         |
| <i>Pseudendoclonium akinetum</i>   | 80   | 0           | 219  | 0           | 144  | 0           | 276  | 0           |
| <i>Pycnococcus provasoli</i>       | 80   | 0           | 219  | 0           | 144  | 0           | 276  | 0           |
| <i>Pyramimonas parkeae</i>         | 80   | 0           | 219  | 0           | 144  | 0           | 276  | 0           |
| <i>Autodesmus obliquus</i>         | 80   | 0           | 219  | 0           | 144  | 0           | 276  | 0           |
| <i>Stigeoclonium helveticum</i>    | 80   | 0           | 219  | 0           | 144  | 0           | 0    | 100         |
| <i>Trebouxia aggregata</i>         | 80   | 0           | 219  | 0           | 144  | 0           | 276  | 0           |
| <i>Volvox carteri</i>              | 80   | 0           | 219  | 0           | 144  | 0           | 276  | 0           |

Table S1. Continued.

| Taxa                               | petB |             | petD |             | petG |             | petL |             |
|------------------------------------|------|-------------|------|-------------|------|-------------|------|-------------|
|                                    | aa   | missing (%) | aa   | missing (%) | aa   | missing (%) | aa   | missing (%) |
| <i>Bigelowiella natans</i>         | 215  | 0           | 160  | 0           | 31   | 0           | 0    | 100         |
| <i>Bryopsis hypnoides</i>          | 215  | 0           | 160  | 0           | 31   | 0           | 31   | 0           |
| <i>Chlamydomonas reinhardtii</i>   | 215  | 0           | 160  | 0           | 31   | 0           | 31   | 0           |
| <i>Chlorella variabilis</i>        | 215  | 0           | 160  | 0           | 31   | 0           | 31   | 0           |
| <i>Chlorokybus atmophyticus</i>    | 215  | 0           | 160  | 0           | 31   | 0           | 31   | 0           |
| <i>Coccomyxa subellipsoidea</i>    | 215  | 0           | 160  | 0           | 31   | 0           | 31   | 0           |
| <i>Dunaliella salina</i>           | 215  | 0           | 160  | 0           | 31   | 0           | 31   | 0           |
| <i>Euglena gracilis</i>            | 215  | 0           | 0    | 100         | 31   | 0           | 0    | 100         |
| <i>Floydiella terrestris</i>       | 215  | 0           | 160  | 0           | 31   | 0           | 31   | 0           |
| <i>Lepidodinium chlorophorum</i>   | 215  | 0           | 160  | 0           | 31   | 0           | 31   | 0           |
| <i>Leptosira terrestris</i>        | 215  | 0           | 160  | 0           | 31   | 0           | 31   | 0           |
| <i>Mesostigma viride</i>           | 215  | 0           | 160  | 0           | 31   | 0           | 31   | 0           |
| <i>Micromonas sp. RCC299</i>       | 215  | 0           | 160  | 0           | 31   | 0           | 0    | 100         |
| <i>Monomastix sp.</i>              | 215  | 0           | 160  | 0           | 31   | 0           | 0    | 100         |
| <i>Nephroselmis olivacea</i>       | 215  | 0           | 160  | 0           | 31   | 0           | 31   | 0           |
| <i>Oedogonium cardiacum</i>        | 215  | 0           | 160  | 0           | 31   | 0           | 31   | 0           |
| <i>Oltmannsiellopsis viridis</i>   | 215  | 0           | 160  | 0           | 31   | 0           | 31   | 0           |
| <i>Oocystis solitaria</i>          | 215  | 0           | 160  | 0           | 31   | 0           | 31   | 0           |
| <i>Ostreococcus tauli</i>          | 215  | 0           | 0    | 100         | 31   | 0           | 0    | 100         |
| <i>Parachlorella kessleri</i>      | 215  | 0           | 160  | 0           | 31   | 0           | 31   | 0           |
| <i>Pedinomonas minor</i>           | 215  | 0           | 160  | 0           | 31   | 0           | 31   | 0           |
| <i>Picocystis salinarum</i>        | 215  | 0           | 160  | 0           | 31   | 0           | 31   | 0           |
| <i>Prasinococcus sp. CCMP1194</i>  | 215  | 0           | 160  | 0           | 31   | 0           | 0    | 100         |
| <i>Prasinoderma coloniale</i>      | 215  | 0           | 160  | 0           | 31   | 0           | 0    | 100         |
| <i>Prasinophyceae sp. CCMP120t</i> | 215  | 0           | 160  | 0           | 31   | 0           | 31   | 0           |
| <i>Pseudendoclonium akinetum</i>   | 215  | 0           | 160  | 0           | 31   | 0           | 31   | 0           |
| <i>Pycnococcus provasoli</i>       | 215  | 0           | 160  | 0           | 31   | 0           | 31   | 0           |
| <i>Pyramimonas parkeae</i>         | 215  | 0           | 0    | 100         | 31   | 0           | 0    | 100         |
| <i>Autodesmus obliquus</i>         | 215  | 0           | 160  | 0           | 31   | 0           | 31   | 0           |
| <i>Stigeoclonium helveticum</i>    | 215  | 0           | 160  | 0           | 31   | 0           | 31   | 0           |
| <i>Trebouxia aggregata</i>         | 215  | 0           | 160  | 0           | 0    | 100         | 31   | 0           |
| <i>Volvox carteri</i>              | 215  | 0           | 160  | 0           | 31   | 0           | 31   | 0           |

Table S1. Continued.

| Taxa                              | psaA |             | psaB |             | psaC |             | psaI             |             |
|-----------------------------------|------|-------------|------|-------------|------|-------------|------------------|-------------|
|                                   | aa   | missing (%) | aa   | missing (%) | aa   | missing (%) | aa               | missing (%) |
| <i>Bigelowiella natans</i>        | 749  | 0           | 708  | 3.0         | 79   | 2.5         | 0                | 100         |
| <i>Bryopsis hypnoides</i>         | 749  | 0           | 730  | 0           | 81   | 0           | 29 <sup>*2</sup> | 0           |
| <i>Chlamydomonas reinhardtii</i>  | 749  | 0           | 730  | 0           | 81   | 0           | 0                | 100         |
| <i>Chlorella variabilis</i>       | 680  | 9.2         | 730  | 0           | 81   | 0           | 29               | 0           |
| <i>Chlorokybus atmophyticus</i>   | 748  | 0.1         | 730  | 0           | 81   | 0           | 29               | 0           |
| <i>Coccomyxa subellipsoidea</i>   | 749  | 0           | 730  | 0           | 81   | 0           | 29               | 0           |
| <i>Dunaliella salina</i>          | 749  | 0           | 730  | 0           | 81   | 0           | 0                | 100         |
| <i>Euglena gracilis</i>           | 749  | 0           | 730  | 0           | 81   | 0           | 0                | 100         |
| <i>Floydiella terrestris</i>      | 749  | 0           | 730  | 0           | 81   | 0           | 0                | 100         |
| <i>Lepidodinium chlorophorum</i>  | 749  | 0           | 730  | 0           | 81   | 0           | 29               | 0           |
| <i>Leptosira terrestris</i>       | 749  | 0           | 730  | 0           | 81   | 0           | 29               | 0           |
| <i>Mesostigma viride</i>          | 748  | 0.1         | 730  | 0           | 81   | 0           | 29               | 0           |
| <i>Micromonas sp. RCC299</i>      | 749  | 0           | 730  | 0           | 81   | 0           | 29               | 0           |
| <i>Monomastix sp.</i>             | 747  | 0.3         | 730  | 0           | 0    | 100         | 29               | 0           |
| <i>Nephroselmis olivacea</i>      | 749  | 0           | 730  | 0           | 81   | 0           | 29               | 0           |
| <i>Oedogonium cardiacum</i>       | 749  | 0           | 730  | 0           | 81   | 0           | 0                | 100         |
| <i>Oltmannsiellopsis viridis</i>  | 749  | 0           | 730  | 0           | 81   | 0           | 29               | 0           |
| <i>Oocystis solitaria</i>         | 749  | 0           | 730  | 0           | 81   | 0           | 29               | 0           |
| <i>Ostreococcus tauli</i>         | 749  | 0           | 729  | 0.1         | 81   | 0           | 29               | 0           |
| <i>Parachlorella kessleri</i>     | 749  | 0           | 730  | 0           | 81   | 0           | 29               | 0           |
| <i>Pedinomonas minor</i>          | 749  | 0           | 730  | 0           | 81   | 0           | 29               | 0           |
| <i>Picocystis salinarum</i>       | 749  | 0           | 730  | 0           | 81   | 0           | 29               | 0           |
| <i>Prasinococcus sp. CCMP1194</i> | 749  | 0           | 730  | 0           | 81   | 0           | 29               | 0           |
| <i>Prasinoderma coloniale</i>     | 749  | 0           | 730  | 0           | 81   | 0           | 29               | 0           |
| <i>Prasinophyceae sp. CCMP120</i> | 748  | 0.1         | 730  | 0           | 81   | 0           | 0                | 100         |
| <i>Pseudendoclonium akinetum</i>  | 749  | 0           | 730  | 0           | 81   | 0           | 29               | 0           |
| <i>Pycnococcus provasoli</i>      | 749  | 0           | 730  | 0           | 81   | 0           | 29               | 0           |
| <i>Pyramimonas parkeae</i>        | 749  | 0           | 730  | 0           | 81   | 0           | 29               | 0           |
| <i>Autodesmus obliquus</i>        | 749  | 0           | 730  | 0           | 81   | 0           | 0                | 100         |
| <i>Stigeoclonium helveticum</i>   | 749  | 0           | 730  | 0           | 81   | 0           | 0                | 100         |
| <i>Trebouxia aggregata</i>        | 749  | 0           | 730  | 0           | 81   | 0           | 29               | 0           |
| <i>Volvox carteri</i>             | 749  | 0           | 730  | 0           | 81   | 0           | 0                | 100         |

Table S1. Continued.

| Taxa                              | psaJ |             | psbA |             | psbB |             | psbC |             |
|-----------------------------------|------|-------------|------|-------------|------|-------------|------|-------------|
|                                   | aa   | missing (%) | aa   | missing (%) | aa   | missing (%) | aa   | missing (%) |
| <i>Bigelowiella natans</i>        | 39   | 0           | 341  | 0           | 508  | 0           | 461  | 0           |
| <i>Bryopsis hypnoides</i>         | 39   | 0           | 341  | 0           | 508  | 0           | 461  | 0           |
| <i>Chlamydomonas reinhardtii</i>  | 39   | 0           | 341  | 0           | 508  | 0           | 461  | 0           |
| <i>Chlorella variabilis</i>       | 39   | 0           | 341  | 0           | 479  | 5.7         | 461  | 0           |
| <i>Chlorokybus atmophyticus</i>   | 39   | 0           | 341  | 0           | 508  | 0.0         | 461  | 0           |
| <i>Coccomyxa subellipsoidea</i>   | 39   | 0           | 341  | 0           | 506  | 0.4         | 455  | 1.3         |
| <i>Dunaliella salina</i>          | 39   | 0           | 341  | 0           | 508  | 0           | 461  | 0           |
| <i>Euglena gracilis</i>           | 37   | 5.1         | 341  | 0           | 508  | 0           | 461  | 0           |
| <i>Floydiella terrestris</i>      | 39   | 0           | 341  | 0           | 508  | 0           | 461  | 0           |
| <i>Lepidodinium chlorophorum</i>  | 37   | 5.1         | 341  | 0           | 489  | 3.7         | 461  | 0           |
| <i>Leptosira terrestris</i>       | 39   | 0           | 341  | 0           | 508  | 0           | 461  | 0           |
| <i>Mesostigma viride</i>          | 39   | 0.0         | 341  | 0           | 508  | 0.0         | 461  | 0           |
| <i>Micromonas sp. RCC299</i>      | 39   | 0           | 341  | 0           | 497  | 2.2         | 461  | 0           |
| <i>Monomastix sp.</i>             | 39   | 0           | 341  | 0           | 508  | 0           | 461  | 0           |
| <i>Nephroselmis olivacea</i>      | 39   | 0           | 341  | 0           | 508  | 0           | 461  | 0           |
| <i>Oedogonium cardiacum</i>       | 39   | 0           | 341  | 0           | 508  | 0           | 461  | 0           |
| <i>Oltmannsiellopsis viridis</i>  | 39   | 0           | 341  | 0           | 508  | 0           | 461  | 0           |
| <i>Oocystis solitaria</i>         | 39   | 0           | 341  | 0           | 508  | 0           | 461  | 0           |
| <i>Ostreococcus tauli</i>         | 39   | 0           | 341  | 0           | 443  | 12.8        | 461  | 0           |
| <i>Parachlorella kessleri</i>     | 39   | 0           | 341  | 0           | 508  | 0           | 461  | 0           |
| <i>Pedinomonas minor</i>          | 39   | 0           | 341  | 0           | 508  | 0           | 461  | 0           |
| <i>Picocystis salinarum</i>       | 0    | 100         | 341  | 0           | 508  | 0.0         | 461  | 0           |
| <i>Prasinococcus sp. CCMP1194</i> | 39   | 0           | 341  | 0           | 508  | 0.0         | 461  | 0           |
| <i>Prasinoderma coloniale</i>     | 39   | 0           | 341  | 0           | 508  | 0.0         | 461  | 0           |
| <i>Prasinophyceae sp. CCMP120</i> | 39   | 0           | 341  | 0           | 508  | 0.0         | 461  | 0           |
| <i>Pseudendoclonium akinetum</i>  | 39   | 0           | 341  | 0           | 508  | 0           | 461  | 0           |
| <i>Pycnococcus provasoli</i>      | 0    | 100         | 341  | 0           | 508  | 0           | 461  | 0           |
| <i>Pyramimonas parkeae</i>        | 39   | 0           | 341  | 0           | 508  | 0           | 461  | 0           |
| <i>Autodesmus obliquus</i>        | 39   | 0           | 341  | 0           | 508  | 0           | 461  | 0           |
| <i>Stigeoclonium helveticum</i>   | 39   | 0           | 341  | 0           | 507  | 0.2         | 461  | 0           |
| <i>Trebouxia aggregata</i>        | 39   | 0           | 341  | 0           | 508  | 0           | 461  | 0           |
| <i>Volvox carteri</i>             | 39   | 0           | 341  | 0           | 508  | 0           | 461  | 0           |

Table S1. Continued.

| Taxa                              | psbD |             | psbE |             | psbF |             | psbH |             |
|-----------------------------------|------|-------------|------|-------------|------|-------------|------|-------------|
|                                   | aa   | missing (%) | aa   | missing (%) | aa   | missing (%) | aa   | missing (%) |
| <i>Bigelowiella natans</i>        | 352  | 0           | 70   | 7.9         | 34   | 0           | 59   | 1.7         |
| <i>Bryopsis hypnoides</i>         | 352  | 0           | 76   | 0           | 34   | 0           | 60   | 0           |
| <i>Chlamydomonas reinhardtii</i>  | 352  | 0           | 76   | 0           | 34   | 0           | 60   | 0           |
| <i>Chlorella variabilis</i>       | 352  | 0           | 76   | 0           | 34   | 0           | 60   | 0           |
| <i>Chlorokybus atmophyticus</i>   | 352  | 0           | 76   | 0           | 34   | 0           | 60   | 0           |
| <i>Coccomyxa subellipsoidea</i>   | 352  | 0           | 76   | 0           | 34   | 0           | 60   | 0           |
| <i>Dunaliella salina</i>          | 352  | 0           | 76   | 0           | 34   | 0           | 60   | 0           |
| <i>Euglena gracilis</i>           | 342  | 2.8         | 76   | 0           | 34   | 0           | 56   | 6.7         |
| <i>Floydiella terrestris</i>      | 352  | 0           | 76   | 0           | 34   | 0           | 60   | 0           |
| <i>Lepidodinium chlorophorum</i>  | 352  | 0           | 76   | 0           | 34   | 0           | 60   | 0           |
| <i>Leptosira terrestris</i>       | 352  | 0           | 76   | 0           | 34   | 0           | 60   | 0           |
| <i>Mesostigma viride</i>          | 352  | 0           | 76   | 0           | 34   | 0           | 60   | 0           |
| <i>Micromonas sp. RCC299</i>      | 352  | 0           | 76   | 0           | 34   | 0           | 60   | 0           |
| <i>Monomastix sp.</i>             | 352  | 0           | 76   | 0           | 34   | 0           | 60   | 0           |
| <i>Nephroselmis olivacea</i>      | 352  | 0           | 76   | 0           | 34   | 0           | 60   | 0           |
| <i>Oedogonium cardiacum</i>       | 352  | 0           | 76   | 0           | 34   | 0           | 60   | 0           |
| <i>Oltmannsiellopsis viridis</i>  | 352  | 0           | 76   | 0           | 34   | 0           | 60   | 0           |
| <i>Oocystis solitaria</i>         | 352  | 0           | 76   | 0           | 34   | 0           | 60   | 0           |
| <i>Ostreococcus tauli</i>         | 352  | 0           | 76   | 0           | 34   | 0           | 60   | 0           |
| <i>Parachlorella kessleri</i>     | 352  | 0           | 76   | 0           | 34   | 0           | 60   | 0           |
| <i>Pedinomonas minor</i>          | 352  | 0           | 76   | 0           | 34   | 0           | 60   | 0           |
| <i>Picocystis salinarum</i>       | 352  | 0           | 76   | 0           | 34   | 0           | 60   | 0           |
| <i>Prasinococcus sp. CCMP1194</i> | 352  | 0           | 76   | 0           | 34   | 0           | 60   | 0           |
| <i>Prasinoderma coloniale</i>     | 352  | 0           | 76   | 0           | 34   | 0           | 60   | 0           |
| <i>Prasinophyceae sp. CCMP120</i> | 352  | 0           | 76   | 0           | 34   | 0           | 60   | 0           |
| <i>Pseudendoclonium akinetum</i>  | 352  | 0           | 76   | 0           | 34   | 0           | 60   | 0           |
| <i>Pycnococcus provasoli</i>      | 352  | 0           | 76   | 0           | 34   | 0           | 60   | 0           |
| <i>Pyramimonas parkeae</i>        | 352  | 0           | 76   | 0           | 34   | 0           | 60   | 0           |
| <i>Autodesmus obliquus</i>        | 352  | 0           | 76   | 0           | 34   | 0           | 60   | 0           |
| <i>Stigeoclonium helveticum</i>   | 352  | 0           | 76   | 0           | 34   | 0           | 60   | 0           |
| <i>Trebouxia aggregata</i>        | 352  | 0           | 76   | 0           | 34   | 0           | 60   | 0           |
| <i>Volvox carteri</i>             | 352  | 0           | 76   | 0           | 34   | 0           | 60   | 0           |

Table S1. Continued.

| Taxa                               | psbI |             | psbJ |             | psbK |             | psbL |             |
|------------------------------------|------|-------------|------|-------------|------|-------------|------|-------------|
|                                    | aa   | missing (%) | aa   | missing (%) | aa   | missing (%) | aa   | missing (%) |
| <i>Bigelowiella natans</i>         | 32   | 0           | 42   | 0           | 39   | 0           | 34   | 0           |
| <i>Bryopsis hypnoides</i>          | 32   | 0           | 42   | 0           | 39   | 0           | 34   | 0           |
| <i>Chlamydomonas reinhardtii</i>   | 32   | 0           | 42   | 0           | 39   | 0           | 34   | 0           |
| <i>Chlorella variabilis</i>        | 32   | 0           | 42   | 0           | 39   | 0           | 34   | 0           |
| <i>Chlorokybus atmophyticus</i>    | 32   | 0           | 42   | 0           | 39   | 0           | 34   | 0           |
| <i>Coccomyxa subellipsoidea</i>    | 32   | 0           | 42   | 0           | 39   | 0           | 34   | 0           |
| <i>Dunaliella salina</i>           | 32   | 0           | 42   | 0           | 39   | 0           | 34   | 0           |
| <i>Euglena gracilis</i>            | 32   | 0           | 42   | 0           | 39   | 0           | 34   | 0           |
| <i>Floydiella terrestris</i>       | 32   | 0           | 42   | 0           | 39   | 0           | 34   | 0           |
| <i>Lepidodinium chlorophorum</i>   | 32   | 0           | 42   | 0           | 39   | 0           | 34   | 0           |
| <i>Leptosira terrestris</i>        | 32   | 0           | 42   | 0           | 39   | 0           | 34   | 0           |
| <i>Mesostigma viride</i>           | 32   | 0           | 42   | 0           | 39   | 0           | 34   | 0           |
| <i>Micromonas sp. RCC299</i>       | 32   | 0           | 41   | 2.4         | 39   | 0           | 34   | 0           |
| <i>Monomastix sp.</i>              | 32   | 0           | 42   | 0           | 39   | 0           | 34   | 0           |
| <i>Nephroselmis olivacea</i>       | 32   | 0           | 42   | 0           | 39   | 0           | 34   | 0           |
| <i>Oedogonium cardiacum</i>        | 32   | 0           | 42   | 0           | 39   | 0           | 34   | 0           |
| <i>Oltmannsiellopsis viridis</i>   | 32   | 0           | 42   | 0           | 39   | 0           | 34   | 0           |
| <i>Oocystis solitaria</i>          | 32   | 0           | 42   | 0           | 39   | 0           | 34   | 0           |
| <i>Ostreococcus tauli</i>          | 32   | 0           | 41   | 2.4         | 39   | 0           | 34   | 0           |
| <i>Parachlorella kessleri</i>      | 32   | 0           | 42   | 0           | 39   | 0           | 34   | 0           |
| <i>Pedinomonas minor</i>           | 32   | 0           | 42   | 0           | 39   | 0           | 34   | 0           |
| <i>Picocystis salinarum</i>        | 32   | 0           | 42   | 0           | 39   | 0           | 34   | 0           |
| <i>Prasinococcus sp. CCMP1194</i>  | 32   | 0           | 42   | 0           | 39   | 0           | 34   | 0           |
| <i>Prasinoderma coloniale</i>      | 32   | 0           | 42   | 0           | 39   | 0           | 34   | 0           |
| <i>Prasinophyceae sp. CCMP120t</i> | 32   | 0           | 42   | 0           | 39   | 0           | 34   | 0           |
| <i>Pseudendoclonium akinetum</i>   | 32   | 0           | 42   | 0           | 39   | 0           | 34   | 0           |
| <i>Pycnococcus provasoli</i>       | 32   | 0           | 42   | 0           | 39   | 0           | 34   | 0           |
| <i>Pyramimonas parkeae</i>         | 32   | 0           | 42   | 0           | 39   | 0           | 34   | 0           |
| <i>Autodesmus obliquus</i>         | 32   | 0           | 42   | 0           | 39   | 0           | 34   | 0           |
| <i>Stigeoclonium helveticum</i>    | 32   | 0           | 42   | 0           | 39   | 0           | 34   | 0           |
| <i>Trebouxia aggregata</i>         | 0    | 100         | 42   | 0           | 39   | 0           | 34   | 0           |
| <i>Volvox carteri</i>              | 32   | 0           | 42   | 0           | 39   | 0           | 17   | 50.0        |

Table S1. Continued.

| Taxa                               | psbM |             | psbN |             | psbT |             | psbZ |             |
|------------------------------------|------|-------------|------|-------------|------|-------------|------|-------------|
|                                    | aa   | missing (%) | aa   | missing (%) | aa   | missing (%) | aa   | missing (%) |
| <i>Bigelowiella natans</i>         | 31   | 0           | 44   | 0           | 31   | 0           | 0    | 100         |
| <i>Bryopsis hypnoides</i>          | 31   | 0           | 44   | 0           | 31   | 0           | 62   | 0           |
| <i>Chlamydomonas reinhardtii</i>   | 31   | 0           | 44   | 0           | 31   | 0           | 62   | 0           |
| <i>Chlorella variabilis</i>        | 31   | 0           | 44   | 0           | 31   | 0           | 62   | 0           |
| <i>Chlorokybus atmophyticus</i>    | 31   | 0           | 43   | 2.3         | 31   | 0           | 62   | 0           |
| <i>Coccomyxa subellipsoidea</i>    | 31   | 0           | 44   | 0           | 31   | 0           | 62   | 0           |
| <i>Dunaliella salina</i>           | 31   | 0           | 44   | 0           | 31   | 0           | 62   | 0           |
| <i>Euglena gracilis</i>            | 0    | 100         | 44   | 0           | 31   | 0           | 62   | 0           |
| <i>Floydiella terrestris</i>       | 31   | 0           | 44   | 0           | 31   | 0           | 62   | 0           |
| <i>Lepidodinium chlorophorum</i>   | 31   | 0           | 44   | 0           | 31   | 0           | 62   | 0           |
| <i>Leptosira terrestris</i>        | 31   | 0           | 44   | 0           | 31   | 0           | 62   | 0           |
| <i>Mesostigma viride</i>           | 31   | 0           | 43   | 2.3         | 31   | 0           | 62   | 0           |
| <i>Micromonas sp. RCC299</i>       | 0    | 100         | 44   | 0           | 31   | 0           | 62   | 0           |
| <i>Monomastix sp.</i>              | 31   | 0           | 44   | 0           | 31   | 0           | 62   | 0           |
| <i>Nephroselmis olivacea</i>       | 31   | 0           | 44   | 0           | 31   | 0           | 62   | 0           |
| <i>Oedogonium cardiacum</i>        | 31   | 0           | 44   | 0           | 31   | 0           | 62   | 0           |
| <i>Oltmannsiellopsis viridis</i>   | 31   | 0           | 44   | 0           | 31   | 0           | 62   | 0           |
| <i>Oocystis solitaria</i>          | 31   | 0           | 44   | 0           | 31   | 0           | 62   | 0           |
| <i>Ostreococcus tauli</i>          | 0    | 100         | 44   | 0           | 31   | 0           | 62   | 0           |
| <i>Parachlorella kessleri</i>      | 31   | 0           | 44   | 0           | 31   | 0           | 62   | 0           |
| <i>Pedinomonas minor</i>           | 31   | 0           | 44   | 0           | 31   | 0           | 62   | 0           |
| <i>Picocystis salinarum</i>        | 31   | 0           | 44   | 0           | 31   | 0           | 62   | 0           |
| <i>Prasinococcus sp. CCMP1194</i>  | 0    | 100         | 43   | 2.3         | 31   | 0           | 62   | 0           |
| <i>Prasinoderma coloniale</i>      | 0    | 100         | 43   | 2.3         | 31   | 0           | 62   | 0           |
| <i>Prasinophyceae sp. CCMP120t</i> | 31   | 0           | 44   | 0           | 31   | 0           | 62   | 0           |
| <i>Pseudendoclonium akinetum</i>   | 31   | 0           | 44   | 0           | 31   | 0           | 62   | 0           |
| <i>Pycnococcus provasoli</i>       | 0    | 100         | 44   | 0           | 31   | 0           | 62   | 0           |
| <i>Pyramimonas parkeae</i>         | 0    | 100         | 44   | 0           | 31   | 0           | 62   | 0           |
| <i>Autodesmus obliquus</i>         | 31   | 0           | 44   | 0           | 31   | 0           | 62   | 0           |
| <i>Stigeoclonium helveticum</i>    | 30   | 3.2         | 44   | 0           | 31   | 0           | 62   | 0           |
| <i>Trebouxia aggregata</i>         | 31   | 0           | 44   | 0           | 31   | 0           | 62   | 0           |
| <i>Volvox carteri</i>              | 30   | 3.2         | 44   | 0           | 31   | 0           | 62   | 0           |



Table S1. Continued.

| Taxa                              | rbcL |             | rpl2 |             | rpl5 |             | rpl14 |             |
|-----------------------------------|------|-------------|------|-------------|------|-------------|-------|-------------|
|                                   | aa   | missing (%) | aa   | missing (%) | aa   | missing (%) | aa    | missing (%) |
| <i>Bigelowiella natans</i>        | 466  | 1.9         | 192  | 24.1        | 154  | 0           | 113   | 0           |
| <i>Bryopsis hypnoides</i>         | 475  | 0           | 253  | 0           | 152  | 1.3         | 113   | 0           |
| <i>Chlamydomonas reinhardtii</i>  | 475  | 0           | 253  | 0           | 154  | 0           | 113   | 0           |
| <i>Chlorella variabilis</i>       | 475  | 0           | 253  | 0           | 154  | 0           | 113   | 0           |
| <i>Chlorokybus atmophyticus</i>   | 475  | 0           | 253  | 0           | 154  | 0           | 113   | 0           |
| <i>Coccomyxa subellipsoidea</i>   | 475  | 0           | 253  | 0           | 154  | 0           | 113   | 0           |
| <i>Dunaliella salina</i>          | 475  | 0           | 253  | 0           | 154  | 0           | 113   | 0           |
| <i>Euglena gracilis</i>           | 475  | 0           | 253  | 0           | 154  | 0           | 113   | 0           |
| <i>Floydiella terrestris</i>      | 475  | 0           | 253  | 0           | 154  | 0           | 113   | 0           |
| <i>Lepidodinium chlorophorum</i>  | 475  | 0           | 253  | 0           | 152  | 1.3         | 113   | 0           |
| <i>Leptosira terrestris</i>       | 475  | 0           | 253  | 0           | 154  | 0           | 113   | 0           |
| <i>Mesostigma viride</i>          | 475  | 0           | 252  | 0.4         | 154  | 0           | 113   | 0           |
| <i>Micromonas sp. RCC299</i>      | 475  | 0           | 253  | 0           | 154  | 0           | 113   | 0           |
| <i>Monomastix sp.</i>             | 475  | 0           | 253  | 0           | 151  | 1.9         | 113   | 0           |
| <i>Nephroselmis olivacea</i>      | 475  | 0           | 253  | 0           | 154  | 0           | 113   | 0           |
| <i>Oedogonium cardiacum</i>       | 475  | 0           | 253  | 0           | 154  | 0           | 113   | 0           |
| <i>Oltmannsiellopsis viridis</i>  | 474  | 0.2         | 253  | 0           | 154  | 0           | 113   | 0           |
| <i>Oocystis solitaria</i>         | 475  | 0           | 253  | 0           | 154  | 0           | 113   | 0           |
| <i>Ostreococcus tauli</i>         | 475  | 0           | 253  | 0           | 154  | 0           | 113   | 0           |
| <i>Parachlorella kessleri</i>     | 475  | 0           | 253  | 0           | 154  | 0           | 113   | 0           |
| <i>Pedinomonas minor</i>          | 475  | 0           | 253  | 0           | 154  | 0           | 113   | 0           |
| <i>Picocystis salinarum</i>       | 475  | 0           | 253  | 0           | 154  | 0           | 113   | 0           |
| <i>Prasinococcus sp. CCMP1194</i> | 475  | 0           | 253  | 0           | 154  | 0           | 113   | 0           |
| <i>Prasinoderma coloniale</i>     | 475  | 0           | 252  | 0.4         | 154  | 0           | 113   | 0           |
| <i>Prasinophyceae sp. CCMP120</i> | 475  | 0           | 253  | 0           | 154  | 0           | 113   | 0           |
| <i>Pseudendoclonium akinetum</i>  | 475  | 0           | 253  | 0           | 154  | 0           | 113   | 0           |
| <i>Pycnococcus provasoli</i>      | 475  | 0           | 253  | 0           | 154  | 0           | 113   | 0           |
| <i>Pyramimonas parkeae</i>        | 475  | 0           | 253  | 0           | 154  | 0           | 113   | 0           |
| <i>Autodesmus obliquus</i>        | 475  | 0           | 253  | 0           | 154  | 0           | 113   | 0           |
| <i>Stigeoclonium helveticum</i>   | 475  | 0           | 253  | 0           | 154  | 0           | 113   | 0           |
| <i>Trebouxia aggregata</i>        | 475  | 0           | 253  | 0           | 154  | 0           | 113   | 0           |
| <i>Volvox carteri</i>             | 475  | 0           | 253  | 0           | 154  | 0           | 113   | 0           |

Table S1. Continued.

| Taxa                               | rpl16 |             | rpl20 |             | rpl23 |             | rpl36 |             |
|------------------------------------|-------|-------------|-------|-------------|-------|-------------|-------|-------------|
|                                    | aa    | missing (%) | aa    | missing (%) | aa    | missing (%) | aa    | missing (%) |
| <i>Bigelowiella natans</i>         | 131   | 0           | 101   | 0           | 36    | 0           | 37    | 0           |
| <i>Bryopsis hypnoides</i>          | 131   | 0           | 101   | 0           | 36    | 0           | 36    | 2.7         |
| <i>Chlamydomonas reinhardtii</i>   | 131   | 0           | 101   | 0           | 36    | 0           | 37    | 0           |
| <i>Chlorella variabilis</i>        | 131   | 0           | 101   | 0           | 36    | 0           | 37    | 0           |
| <i>Chlorokybus atmophyticus</i>    | 131   | 0           | 101   | 0           | 36    | 0           | 37    | 0           |
| <i>Coccomyxa subellipsoidea</i>    | 131   | 0           | 101   | 0           | 36    | 0           | 37    | 0           |
| <i>Dunaliella salina</i>           | 131   | 0           | 101   | 0           | 36    | 0           | 37    | 0           |
| <i>Euglena gracilis</i>            | 131   | 0           | 101   | 0           | 32    | 11.1        | 37    | 0           |
| <i>Floydiella terrestris</i>       | 131   | 0           | 101   | 0           | 36    | 0           | 37    | 0           |
| <i>Lepidodinium chlorophorum</i>   | 131   | 0           | 101   | 0           | 36    | 0           | 37    | 0           |
| <i>Leptosira terrestris</i>        | 131   | 0           | 101   | 0           | 36    | 0           | 37    | 0           |
| <i>Mesostigma viride</i>           | 131   | 0           | 101   | 0           | 36    | 0           | 37    | 0           |
| <i>Micromonas sp. RCC299</i>       | 131   | 0           | 101   | 0           | 36    | 0           | 0     | 100         |
| <i>Monomastix sp.</i>              | 131   | 0           | 101   | 0           | 36    | 0           | 37    | 0           |
| <i>Nephroselmis olivacea</i>       | 131   | 0           | 101   | 0           | 36    | 0           | 37    | 0           |
| <i>Oedogonium cardiacum</i>        | 131   | 0           | 101   | 0           | 36    | 0           | 37    | 0           |
| <i>Oltmannsiellopsis viridis</i>   | 131   | 0           | 101   | 0           | 36    | 0           | 37    | 0           |
| <i>Oocystis solitaria</i>          | 131   | 0           | 101   | 0           | 36    | 0           | 37    | 0           |
| <i>Ostreococcus tauli</i>          | 131   | 0           | 101   | 0           | 36    | 0           | 37    | 0           |
| <i>Parachlorella kessleri</i>      | 131   | 0           | 101   | 0           | 36    | 0           | 37    | 0           |
| <i>Pedinomonas minor</i>           | 131   | 0           | 101   | 0           | 36    | 0           | 37    | 0           |
| <i>Picocystis salinarum</i>        | 131   | 0           | 101   | 0           | 36    | 0           | 37    | 0           |
| <i>Prasinococcus sp. CCMP1194</i>  | 131   | 0           | 101   | 0           | 36    | 0           | 37    | 0           |
| <i>Prasinoderma coloniale</i>      | 131   | 0           | 101   | 0           | 36    | 0           | 37    | 0           |
| <i>Prasinophyceae sp. CCMP120t</i> | 131   | 0           | 101   | 0           | 36    | 0           | 37    | 0           |
| <i>Pseudendoclonium akinetum</i>   | 131   | 0           | 101   | 0           | 36    | 0           | 37    | 0           |
| <i>Pycnococcus provasoli</i>       | 131   | 0           | 101   | 0           | 36    | 0           | 37    | 0           |
| <i>Pyramimonas parkeae</i>         | 131   | 0           | 101   | 0           | 36    | 0           | 37    | 0           |
| <i>Autodesmus obliquus</i>         | 131   | 0           | 101   | 0           | 36    | 0           | 37    | 0           |
| <i>Stigeoclonium helveticum</i>    | 131   | 0           | 101   | 0           | 36    | 0           | 37    | 0           |
| <i>Trebouxia aggregata</i>         | 131   | 0           | 101   | 0           | 36    | 0           | 37    | 0           |
| <i>Volvox carteri</i>              | 131   | 0           | 101   | 0           | 36    | 0           | 37    | 0           |

Table S1. Continued.

| Taxa                               | rps2 |             | rps3 |             | rps4 |             | rps7 |             |
|------------------------------------|------|-------------|------|-------------|------|-------------|------|-------------|
|                                    | aa   | missing (%) | aa   | missing (%) | aa   | missing (%) | aa   | missing (%) |
| <i>Bigelowiella natans</i>         | 174  | 0           | 115  | 0           | 108  | 12.2        | 128  | 0           |
| <i>Bryopsis hypnoides</i>          | 174  | 0           | 115  | 0           | 123  | 0           | 128  | 0           |
| <i>Chlamydomonas reinhardtii</i>   | 174  | 0           | 115  | 0           | 123  | 0           | 128  | 0           |
| <i>Chlorella variabilis</i>        | 174  | 0           | 115  | 0           | 123  | 0           | 128  | 0           |
| <i>Chlorokybus atmophyticus</i>    | 174  | 0           | 115  | 0           | 115  | 6.5         | 128  | 0           |
| <i>Coccomyxa subellipsoidea</i>    | 174  | 0           | 115  | 0           | 123  | 0           | 128  | 0           |
| <i>Dunaliella salina</i>           | 174  | 0           | 115  | 0           | 123  | 0           | 128  | 0           |
| <i>Euglena gracilis</i>            | 173  | 0.6         | 115  | 0           | 108  | 12.2        | 128  | 0           |
| <i>Floydiella terrestris</i>       | 174  | 0           | 115  | 0           | 123  | 0           | 128  | 0           |
| <i>Lepidodinium chlorophorum</i>   | 173  | 0.6         | 76   | 33.9        | 109  | 11.4        | 128  | 0           |
| <i>Leptosira terrestris</i>        | 174  | 0           | 115  | 0           | 123  | 0           | 128  | 0           |
| <i>Mesostigma viride</i>           | 174  | 0           | 115  | 0           | 114  | 7.3         | 128  | 0           |
| <i>Micromonas sp. RCC299</i>       | 174  | 0           | 115  | 0           | 123  | 0           | 128  | 0           |
| <i>Monomastix sp.</i>              | 174  | 0           | 115  | 0           | 123  | 0           | 128  | 0           |
| <i>Nephroselmis olivacea</i>       | 174  | 0           | 115  | 0           | 123  | 0           | 128  | 0           |
| <i>Oedogonium cardiacum</i>        | 174  | 0           | 115  | 0           | 123  | 0           | 128  | 0           |
| <i>Oltmannsiellopsis viridis</i>   | 174  | 0           | 115  | 0           | 123  | 0           | 128  | 0           |
| <i>Oocystis solitaria</i>          | 174  | 0           | 115  | 0           | 123  | 0           | 128  | 0           |
| <i>Ostreococcus tauli</i>          | 174  | 0           | 115  | 0           | 123  | 0           | 128  | 0           |
| <i>Parachlorella kessleri</i>      | 174  | 0           | 115  | 0           | 123  | 0           | 128  | 0           |
| <i>Pedinomonas minor</i>           | 174  | 0           | 115  | 0           | 123  | 0           | 128  | 0           |
| <i>Picocystis salinarum</i>        | 174  | 0           | 115  | 0           | 123  | 0           | 128  | 0           |
| <i>Prasinococcus sp. CCMP1194</i>  | 174  | 0           | 115  | 0           | 115  | 6.5         | 128  | 0           |
| <i>Prasinoderma coloniale</i>      | 174  | 0           | 115  | 0           | 123  | 0           | 128  | 0           |
| <i>Prasinophyceae sp. CCMP120t</i> | 174  | 0           | 111  | 3.5         | 115  | 6.5         | 128  | 0           |
| <i>Pseudendoclonium akinetum</i>   | 174  | 0           | 115  | 0           | 123  | 0           | 128  | 0           |
| <i>Pycnococcus provasoli</i>       | 174  | 0           | 115  | 0           | 123  | 0           | 128  | 0           |
| <i>Pyramimonas parkeae</i>         | 174  | 0           | 115  | 0           | 123  | 0           | 128  | 0           |
| <i>Autodesmus obliquus</i>         | 92   | 47.1        | 115  | 0           | 123  | 0           | 128  | 0           |
| <i>Stigeoclonium helveticum</i>    | 174  | 0           | 115  | 0           | 123  | 0           | 128  | 0           |
| <i>Trebouxia aggregata</i>         | 174  | 0           | 115  | 0           | 109  | 11.4        | 128  | 0           |
| <i>Volvox carteri</i>              | 174  | 0           | 115  | 0           | 123  | 0           | 128  | 0           |

Table S1. Continued.

| Taxa                               | rps9 |             | rps11 |             | rps12 |             | rps14 |             |
|------------------------------------|------|-------------|-------|-------------|-------|-------------|-------|-------------|
|                                    | aa   | missing (%) | aa    | missing (%) | aa    | missing (%) | aa    | missing (%) |
| <i>Bigelowiella natans</i>         | 0    | 100         | 120   | 0           | 119   | 0           | 100   | 0           |
| <i>Bryopsis hypnoides</i>          | 88   | 0           | 120   | 0           | 119   | 0           | 100   | 0           |
| <i>Chlamydomonas reinhardtii</i>   | 88   | 0           | 120   | 0           | 119   | 0           | 100   | 0           |
| <i>Chlorella variabilis</i>        | 88   | 0           | 120   | 0           | 119   | 0           | 100   | 0           |
| <i>Chlorokybus atmophyticus</i>    | 88   | 0           | 120   | 0           | 119   | 0           | 100   | 0           |
| <i>Coccomyxa subellipsoidea</i>    | 88   | 0           | 120   | 0           | 119   | 0           | 100   | 0           |
| <i>Dunaliella salina</i>           | 88   | 0           | 120   | 0           | 119   | 0           | 100   | 0           |
| <i>Euglena gracilis</i>            | 88   | 0           | 120   | 0           | 119   | 0           | 100   | 0           |
| <i>Floydiella terrestris</i>       | 88   | 0           | 120   | 0           | 119   | 0           | 100   | 0           |
| <i>Lepidodinium chlorophorum</i>   | 88   | 0           | 119   | 0.8         | 119   | 0           | 100   | 0           |
| <i>Leptosira terrestris</i>        | 88   | 0           | 120   | 0           | 119   | 0           | 100   | 0           |
| <i>Mesostigma viride</i>           | 88   | 0           | 120   | 0           | 119   | 0           | 100   | 0           |
| <i>Micromonas sp. RCC299</i>       | 88   | 0           | 120   | 0           | 119   | 0           | 100   | 0           |
| <i>Monomastix sp.</i>              | 0    | 100         | 120   | 0           | 119   | 0           | 99    | 1           |
| <i>Nephroselmis olivacea</i>       | 88   | 0           | 120   | 0           | 119   | 0           | 100   | 0           |
| <i>Oedogonium cardiacum</i>        | 88   | 0           | 120   | 0           | 119   | 0           | 100   | 0           |
| <i>Oltmannsiellopsis viridis</i>   | 88   | 0           | 120   | 0           | 119   | 0           | 100   | 0           |
| <i>Oocystis solitaria</i>          | 88   | 0           | 120   | 0           | 119   | 0           | 100   | 0           |
| <i>Ostreococcus tauli</i>          | 88   | 0           | 120   | 0           | 119   | 0           | 100   | 0           |
| <i>Parachlorella kessleri</i>      | 88   | 0           | 120   | 0           | 119   | 0           | 100   | 0           |
| <i>Pedinomonas minor</i>           | 88   | 0           | 120   | 0           | 119   | 0           | 100   | 0           |
| <i>Picocystis salinarum</i>        | 88   | 0           | 120   | 0           | 119   | 0           | 100   | 0           |
| <i>Prasinococcus sp. CCMP1194</i>  | 88   | 0           | 120   | 0           | 119   | 0           | 98    | 2           |
| <i>Prasinoderma coloniale</i>      | 88   | 0           | 120   | 0           | 119   | 0           | 100   | 0           |
| <i>Prasinophyceae sp. CCMP120t</i> | 88   | 0           | 118   | 1.7         | 119   | 0           | 100   | 0           |
| <i>Pseudendoclonium akinetum</i>   | 88   | 0           | 120   | 0           | 119   | 0           | 100   | 0           |
| <i>Pycnococcus provasoli</i>       | 0    | 100         | 120   | 0           | 119   | 0           | 100   | 0           |
| <i>Pyramimonas parkeae</i>         | 88   | 0           | 120   | 0           | 119   | 0           | 100   | 0           |
| <i>Autodesmus obliquus</i>         | 88   | 0           | 120   | 0           | 119   | 0           | 100   | 0           |
| <i>Stigeoclonium helveticum</i>    | 88   | 0           | 120   | 0           | 119   | 0           | 100   | 0           |
| <i>Trebouxia aggregata</i>         | 88   | 0           | 120   | 0           | 119   | 0           | 100   | 0           |
| <i>Volvox carteri</i>              | 88   | 0           | 120   | 0           | 119   | 0           | 100   | 0           |

Table S1. Continued.

| Taxa                              | rps18 |             | rps19 |             | tufA |             | ycf3 |             |
|-----------------------------------|-------|-------------|-------|-------------|------|-------------|------|-------------|
|                                   | aa    | missing (%) | aa    | missing (%) | aa   | missing (%) | aa   | missing (%) |
| <i>Bigelowiella natans</i>        | 48    | 0           | 77    | 3.8         | 359  | 0           | 161  | 0           |
| <i>Bryopsis hypnoides</i>         | 48    | 0           | 80    | 0           | 359  | 0           | 161  | 0           |
| <i>Chlamydomonas reinhardtii</i>  | 48    | 0           | 80    | 0           | 359  | 0           | 161  | 0           |
| <i>Chlorella variabilis</i>       | 48    | 0           | 80    | 0           | 359  | 0           | 161  | 0           |
| <i>Chlorokybus atmophyticus</i>   | 48    | 0           | 80    | 0           | 359  | 0           | 161  | 0           |
| <i>Coccomyxa subellipsoidea</i>   | 48    | 0           | 80    | 0           | 359  | 0           | 161  | 0           |
| <i>Dunaliella salina</i>          | 48    | 0           | 80    | 0           | 359  | 0           | 161  | 0           |
| <i>Euglena gracilis</i>           | 48    | 0           | 80    | 0           | 359  | 0           | 0    | 100         |
| <i>Floydiella terrestris</i>      | 48    | 0           | 80    | 0           | 359  | 0           | 161  | 0           |
| <i>Lepidodinium chlorophorum</i>  | 48    | 0           | 78    | 2.5         | 358  | 0.3         | 161  | 0           |
| <i>Leptosira terrestris</i>       | 48    | 0           | 80    | 0           | 359  | 0           | 161  | 0           |
| <i>Mesostigma viride</i>          | 48    | 0           | 80    | 0           | 359  | 0           | 161  | 0           |
| <i>Micromonas sp. RCC299</i>      | 48    | 0           | 80    | 0           | 359  | 0           | 161  | 0           |
| <i>Monomastix sp.</i>             | 48    | 0           | 80    | 0           | 359  | 0           | 161  | 0           |
| <i>Nephroselmis olivacea</i>      | 48    | 0           | 80    | 0           | 359  | 0           | 161  | 0           |
| <i>Oedogonium cardiacum</i>       | 48    | 0           | 80    | 0           | 359  | 0           | 161  | 0           |
| <i>Oltmannsiellopsis viridis</i>  | 48    | 0           | 80    | 0           | 359  | 0           | 161  | 0           |
| <i>Oocystis solitaria</i>         | 48    | 0           | 80    | 0           | 359  | 0           | 161  | 0           |
| <i>Ostreococcus tauli</i>         | 48    | 0           | 80    | 0           | 359  | 0           | 161  | 0           |
| <i>Parachlorella kessleri</i>     | 48    | 0           | 80    | 0           | 359  | 0           | 161  | 0           |
| <i>Pedinomonas minor</i>          | 48    | 0           | 80    | 0           | 359  | 0           | 161  | 0           |
| <i>Picocystis salinarum</i>       | 48    | 0           | 80    | 0           | 359  | 0           | 41   | 74.5        |
| <i>Prasinococcus sp. CCMP1194</i> | 48    | 0           | 80    | 0           | 359  | 0           | 161  | 0           |
| <i>Prasinoderma coloniale</i>     | 48    | 0           | 80    | 0           | 359  | 0           | 161  | 0           |
| <i>Prasinophyceae sp. CCMP120</i> | 48    | 0           | 80    | 0           | 359  | 0           | 161  | 0           |
| <i>Pseudendoclonium akinetum</i>  | 48    | 0           | 80    | 0           | 359  | 0           | 161  | 0           |
| <i>Pycnococcus provasoli</i>      | 48    | 0           | 80    | 0           | 359  | 0           | 161  | 0           |
| <i>Pyramimonas parkeae</i>        | 48    | 0           | 80    | 0           | 359  | 0           | 161  | 0           |
| <i>Autodesmus obliquus</i>        | 48    | 0           | 80    | 0           | 359  | 0           | 161  | 0           |
| <i>Stigeoclonium helveticum</i>   | 48    | 0           | 80    | 0           | 359  | 0           | 161  | 0           |
| <i>Trebouxia aggregata</i>        | 48    | 0           | 80    | 0           | 359  | 0           | 161  | 0           |
| <i>Volvox carteri</i>             | 48    | 0           | 80    | 0           | 359  | 0           | 161  | 0           |

Table S1. Continued.

| Taxa                              | Total |             |
|-----------------------------------|-------|-------------|
|                                   | aa    | missing (%) |
| <i>Bigelowiella natans</i>        | 8585  | 3.7         |
| <i>Bryopsis hypnoides</i>         | 8915  | 0.0         |
| <i>Chlamydomonas reinhardtii</i>  | 8889  | 0.3         |
| <i>Chlorella variabilis</i>       | 8820  | 1.1         |
| <i>Chlorokybus atmophyticus</i>   | 8908  | 0.1         |
| <i>Coccomyxa subellipsoidea</i>   | 8887  | 0.3         |
| <i>Dunaliella salina</i>          | 8889  | 0.3         |
| <i>Euglena gracilis</i>           | 8049  | 9.7         |
| <i>Floydiella terrestris</i>      | 8613  | 3.4         |
| <i>Lepidodinium chlorophorum</i>  | 8835  | 0.9         |
| <i>Leptosira terrestris</i>       | 8918  | 0.0         |
| <i>Mesostigma viride</i>          | 8905  | 0.1         |
| <i>Micromonas sp. RCC299</i>      | 8806  | 1.3         |
| <i>Monomastix sp.</i>             | 8712  | 2.3         |
| <i>Nephroselmis olivacea</i>      | 8917  | 0.0         |
| <i>Oedogonium cardiacum</i>       | 8613  | 3.4         |
| <i>Oltmannsiellopsis viridis</i>  | 8917  | 0.0         |
| <i>Oocystis solitaria</i>         | 8918  | 0.0         |
| <i>Ostreococcus tauli</i>         | 8628  | 3.3         |
| <i>Parachlorella kessleri</i>     | 8918  | 0.0         |
| <i>Pedinomonas minor</i>          | 8918  | 0.0         |
| <i>Picocystis salinarum</i>       | 8758  | 1.8         |
| <i>Prasinococcus sp. CCMP1194</i> | 8844  | 0.8         |
| <i>Prasinoderma coloniale</i>     | 8853  | 0.7         |
| <i>Prasinophyceae sp. CCMP120</i> | 8869  | 0.5         |
| <i>Pseudendoclonium akinetum</i>  | 8918  | 0.0         |
| <i>Pycnococcus provasoli</i>      | 8760  | 1.8         |
| <i>Pyramimonas parkeae</i>        | 8696  | 2.5         |
| <i>Autodesmus obliquus</i>        | 8807  | 1.2         |
| <i>Stigeoclonium helveticum</i>   | 8611  | 3.4         |
| <i>Trebouxia aggregata</i>        | 8841  | 0.9         |
| <i>Volvox carteri</i>             | 8871  | 0.5         |

Table S2. Codon frequency<sup>1</sup> and tRNA genes encoded in *Lepidodinium chlorophorum* plastid genome

| Codons | AA    | Freq (%) | tRNA             | Codons | AA   | Freq (%) | tRNA  | Codons | AA    | Freq (%) | tRNA           | Codons | AA   | Freq (%) | tRNA           |       |
|--------|-------|----------|------------------|--------|------|----------|-------|--------|-------|----------|----------------|--------|------|----------|----------------|-------|
| UUU    | F     | 58.59    | GAA              | UCU    | S    | 25.93    | GGA   | UAU    | Y     | 25.8     | GUA            | UGU    | C    | 8.73     | GCA            |       |
| UUC    |       | 11.10    |                  | UCC    |      | 6.67     |       | UAC    |       | 9.31     |                | UGC    |      | 3.40     |                |       |
| UUA    | L     | 2.57     | CAA              | UCA    | P    | 1.03     | CGA   | UAA    | *     | 2.82     | — <sup>3</sup> | UGA    | *    | 0.39     | — <sup>3</sup> |       |
| UUG    |       | 36.07    |                  | UCG    |      | 15.27    |       | UAG    | *     | 0.71     |                | UGG    | W    | 16.94    |                | CCA   |
| CUU    |       | 26.95    |                  | CCU    |      | 17.01    |       | CAU    | H     | 15.92    |                | GUG    | CGU  | R        |                | 17.58 |
| CUC    |       | 6.48     | CCC              | 2.89   | CAC  | 6.42     | CGC   | 6.48   |       |          |                |        |      |          |                |       |
| CUA    |       | 19.38    | CCA              | 14.57  | CAA  | Q        | 32.41 | UUG    | CGA   | 18.87    | 3.02           |        |      |          |                |       |
| CUG    |       | 7.19     | CCG              | 4.43   | CAG  |          | 6.16  |        | CGG   |          |                |        |      |          |                |       |
| AUU    |       | I        | 54.74            | GAU    | ACU  | T        | 18.74 | UGU    | AAU   | N        | 35.81          | GUU    | AGU  | S        | 12.26          | GCU   |
| AUC    | 13.09 |          | ACC              |        | 4.88 |          | AAC   |        | 15.02 |          | AGC            |        | 5.58 |          |                |       |
| AUA    | M     | 28.62    | CAU <sup>2</sup> | ACA    | A    | 26.50    | UGC   | AAA    | K     | 52.56    | UUU            | AGA    | R    | 15.66    | UCU            |       |
| AUG    |       | 14.57    |                  | ACG    |      | 6.55     |       | AAG    |       | 9.88     |                | CUU    |      | AGG      |                | 3.40  |
| GUU    | V     | 27.66    | UAC              | GCU    | A    | 18.93    | UGC   | GAU    | D     | 24.84    | GUC            | GGU    | G    | 23.49    | UCC            |       |
| GUC    |       | 5.84     |                  | GCC    |      | 4.24     |       | GAC    |       | 7.64     |                | GGC    |      | 4.68     |                |       |
| GUA    |       | 20.86    |                  | GCA    |      | 22.53    |       | GAA    | E     | 35.81    | UUC            | GGA    |      | 28.94    |                |       |
| GUG    |       | 7.44     |                  | GCG    |      | 6.23     |       | GAG    |       | 7.12     |                | GGG    |      | 4.81     |                |       |

<sup>1</sup>This analysis included functionally unassigned open reading frames (URFs) and excluded the supposed pseudogene of *rpoC1*.

<sup>2</sup>Both methionyl-tRNA genes for initiation and elongation were found.

<sup>3</sup>No tRNA for termination codons.
